# Supplementary material
Source: PubMed Central journal article supplement (PMC7309534)
Supplement: js9b00036_si_001.pdf [file js9b00036_si_001.pdf]

# Supporting information

## Investigation of neutral losses and the citrulline effect for modified H4 N-terminal pentapeptides

Arnold Steckel<sup>1,2</sup>, Katalin Uray<sup>2</sup>, Gergő Kalló<sup>3</sup>, Éva Csósz<sup>3</sup>, Gitta Schlosser<sup>2,4\*</sup>

<sup>1</sup> Hevesy György PhD School of Chemistry, ELTE Eötvös Loránd University, Budapest, Pázmány Péter sétány 1/A, 1117, Hungary

<sup>2</sup> MTA-ELTE Research Group of Peptide Chemistry, ELTE Eötvös Loránd University, Budapest, Pázmány Péter sétány 1/A, 1117, Hungary

<sup>3</sup> Proteomics Core Facility, Department of Biochemistry and Molecular Biology, Faculty of Medicine, University of Debrecen, Debrecen, Nagyerdei krt. 98, 4032, Hungary

<sup>4</sup> Department of Analytical Chemistry, ELTE Eötvös Loránd University, Budapest, Pázmány Péter sétány 1/A, 1117, Hungary

\* Corresponding author: Gitta Schlosser (schlosser@caesar.elte.hu)

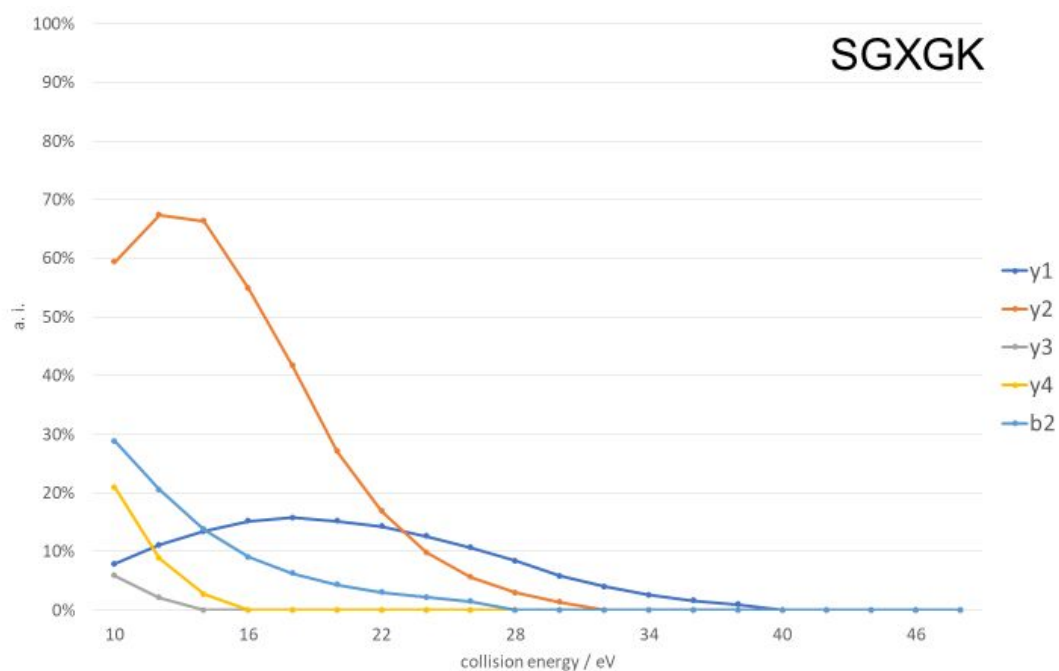

**Figure S1a** Fragment distribution of the peptide SGXGK upon higher-energy collision-induced dissociation (HCD) as a function of collision energy

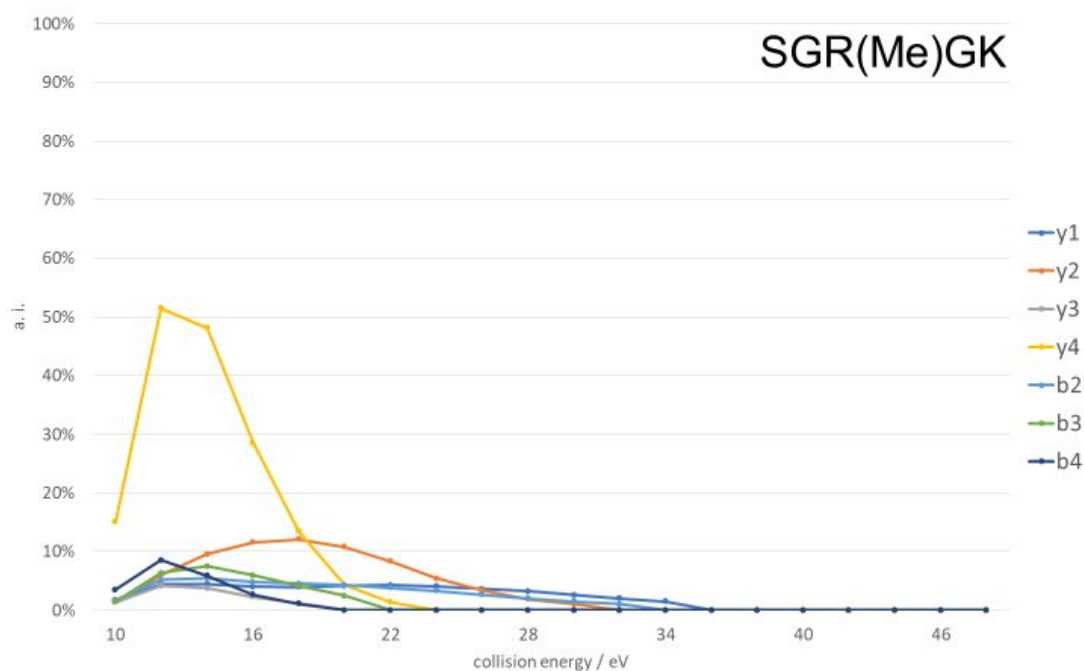

**Figure S1b** Fragment distribution of the peptide SGR(Me)GK upon higher-energy collision-induced dissociation (HCD) as a function of collision energy

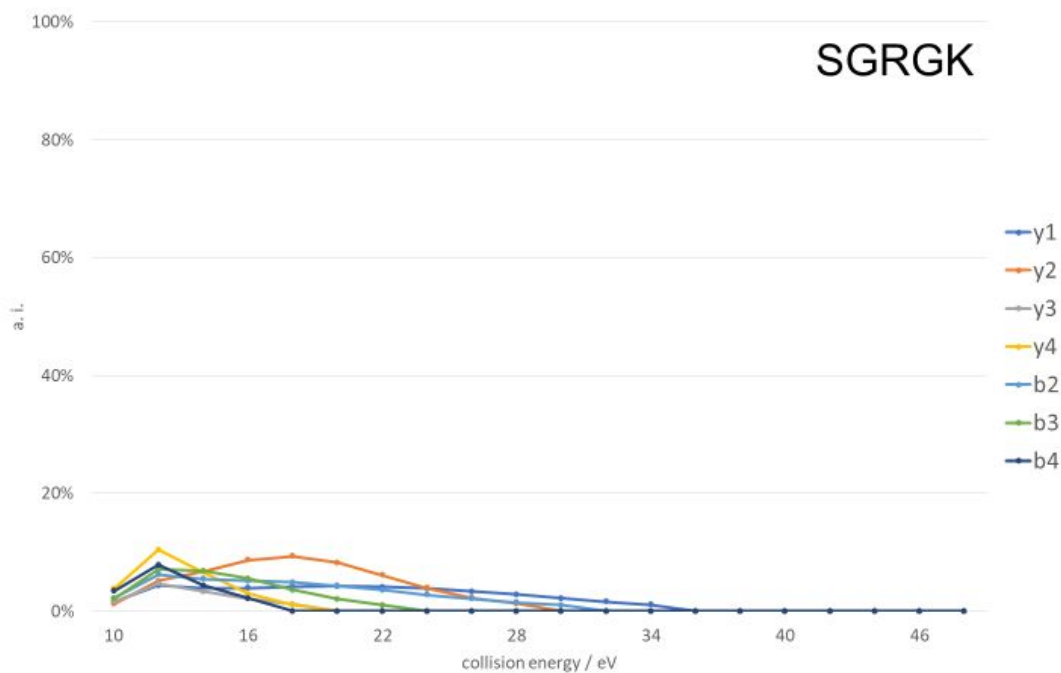

**Figure S1c** Fragment distribution of the peptide SGRGK upon higher-energy collision-induced dissociation (HCD) as a function of collision energy

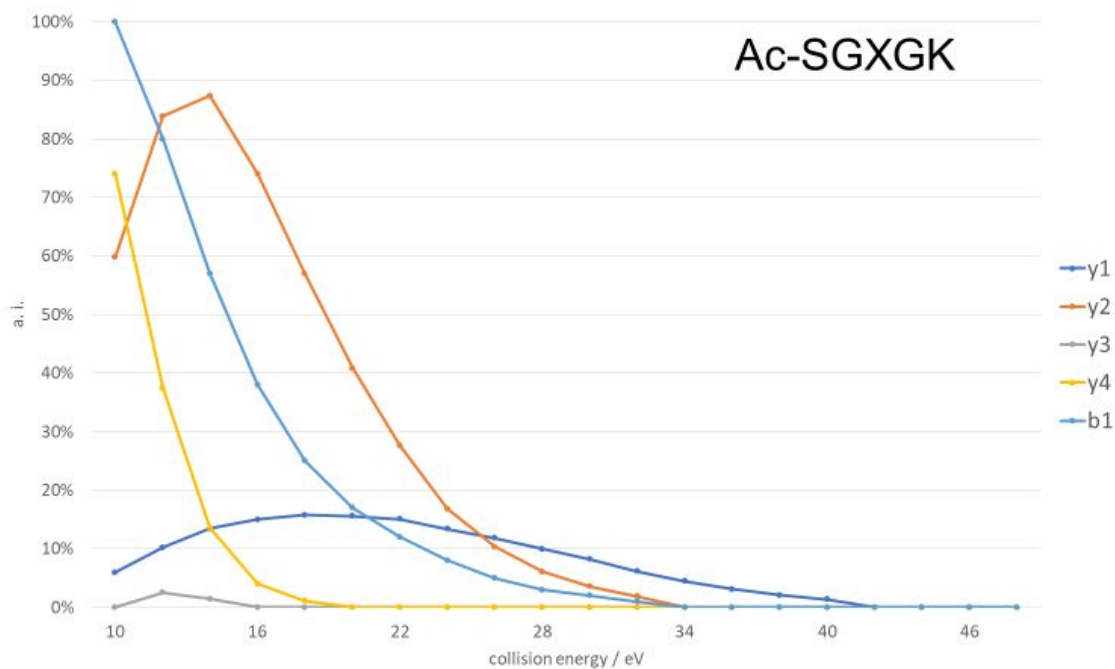

**Figure S1d** Fragment distribution of the peptide Ac-SGXGK upon higher-energy collision-induced dissociation (HCD) as a function of collision energy

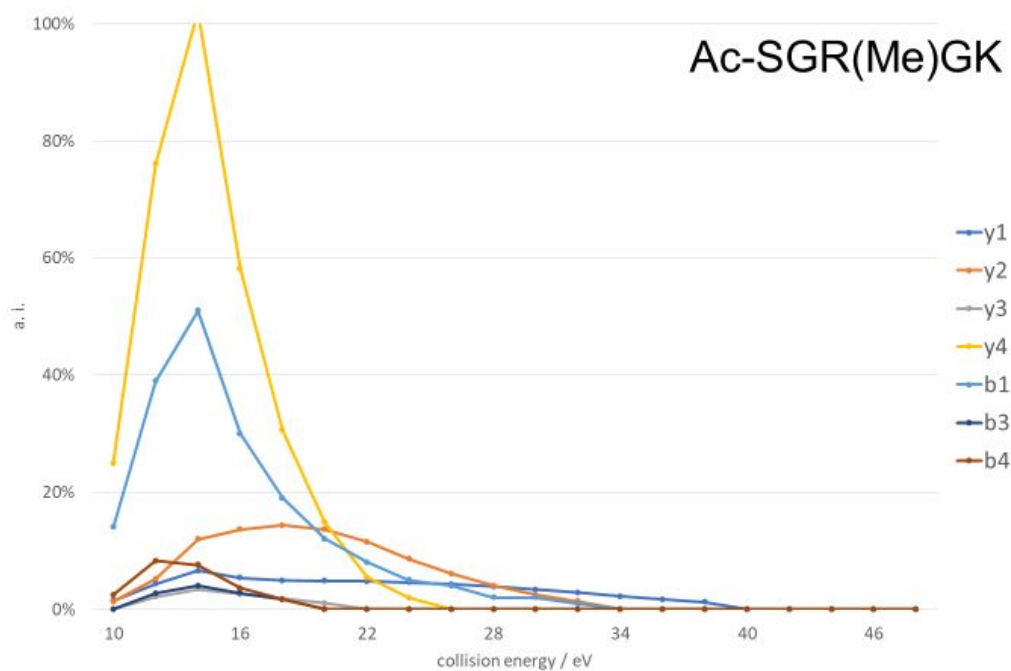

**Figure S1e** Fragment distribution of the peptide Ac-SGR(Me)GK upon higher-energy collision-induced dissociation (HCD) as a function of collision energy

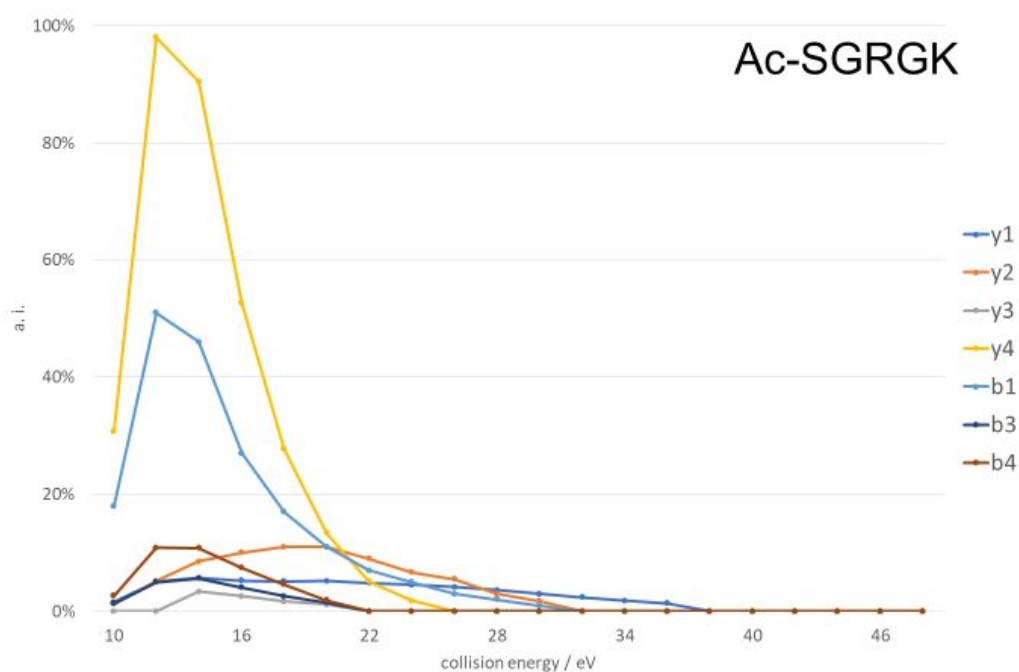

**Figure S1f** Fragment distribution of the peptide Ac-SGRGK upon higher-energy collision-induced dissociation (HCD) as a function of collision energy

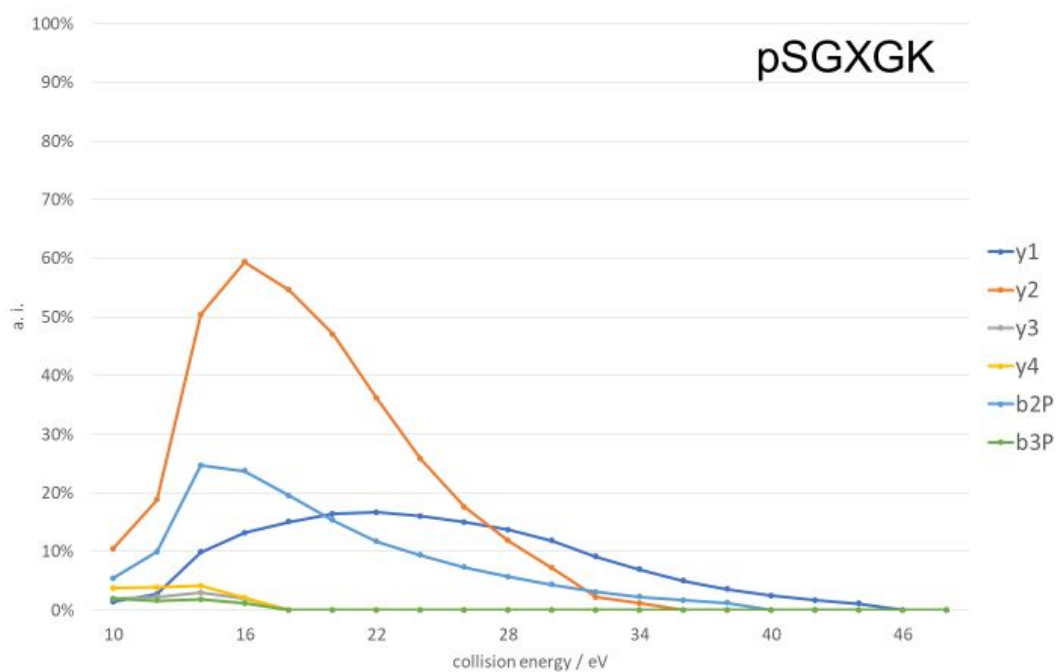

**Figure S1g** Fragment distribution of the peptide pSGXGK upon higher-energy collision-induced dissociation (HCD) as a function of collision energy

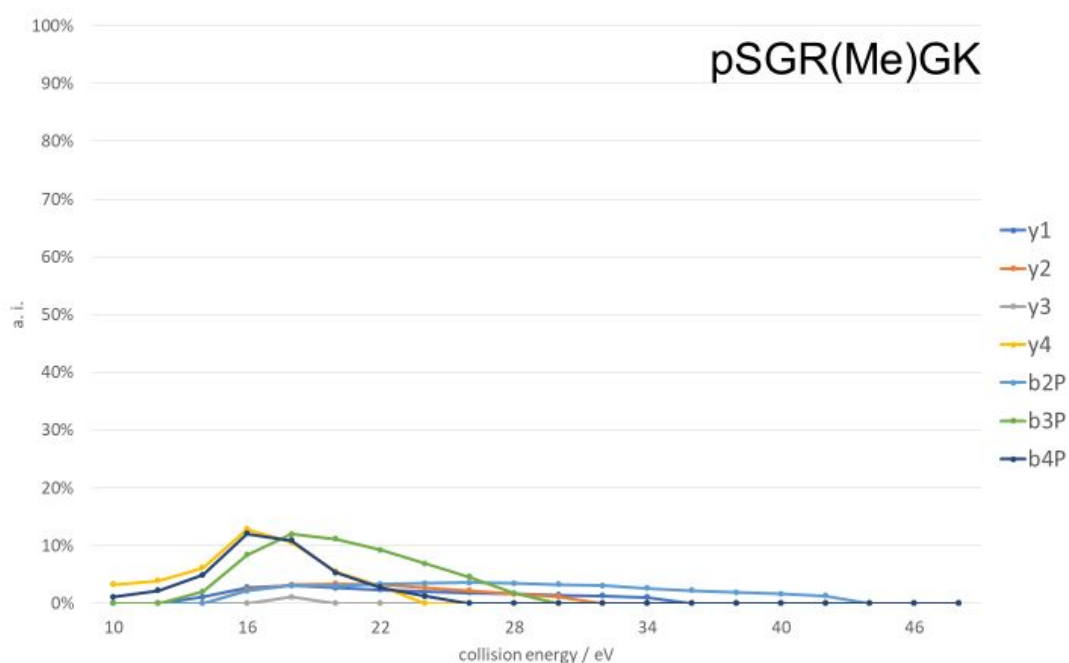

**Figure S1h** Fragment distribution of the peptide pSGR(Me)GK upon higher-energy collision-induced dissociation (HCD) as a function of collision energy

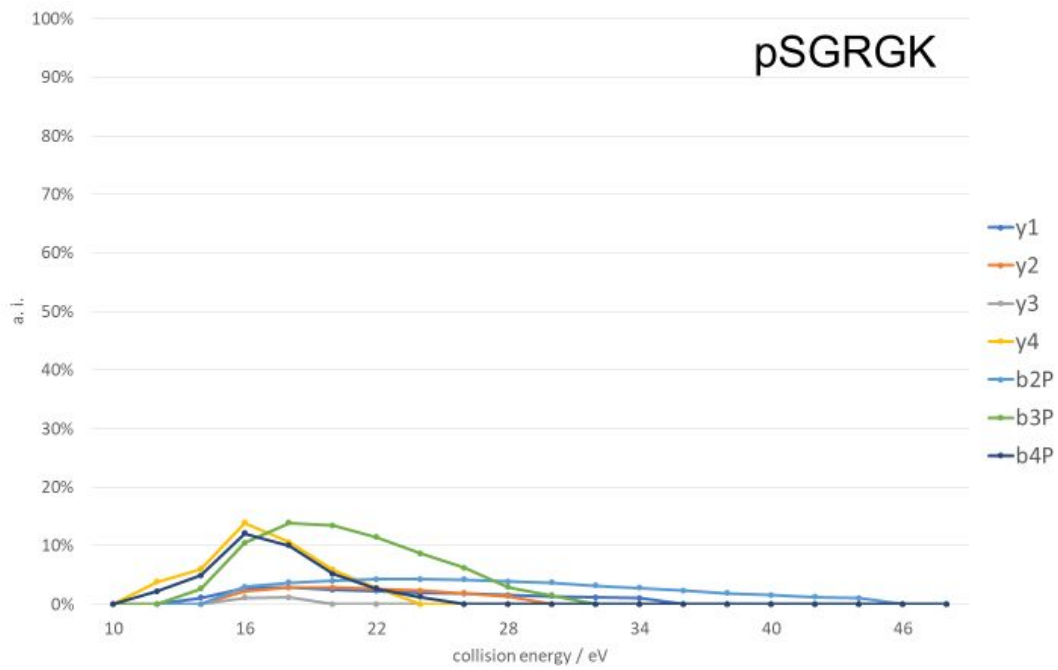

**Figure S1i** Fragment distribution of the peptide pSGRGK upon higher-energy collision-induced dissociation (HCD) as a function of collision energy

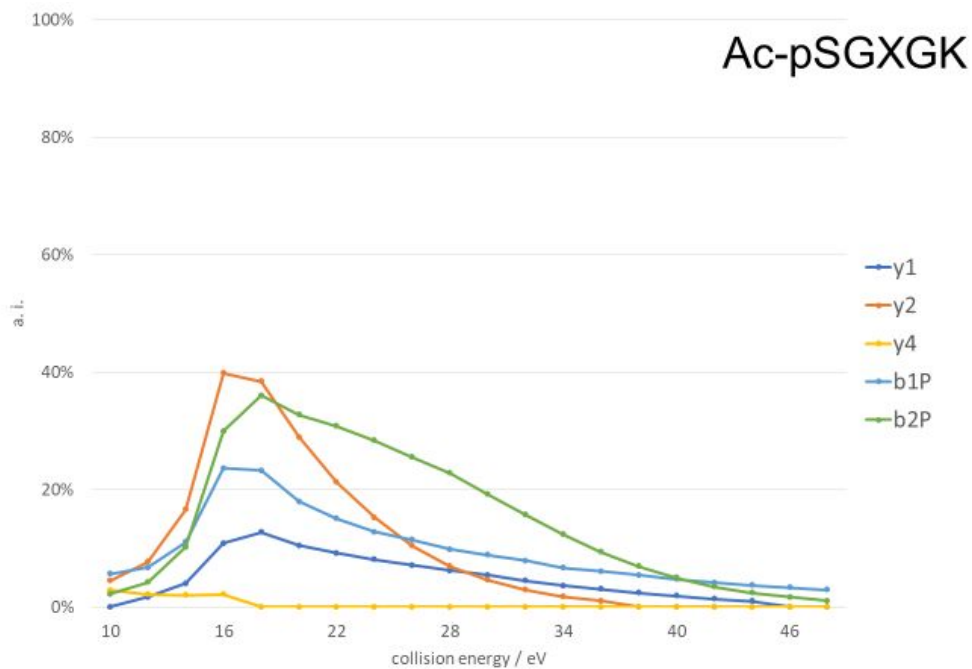

**Figure S1j** Fragment distribution of the peptide Ac-pSGXGK upon higher-energy collision-induced dissociation (HCD) as a function of collision energy

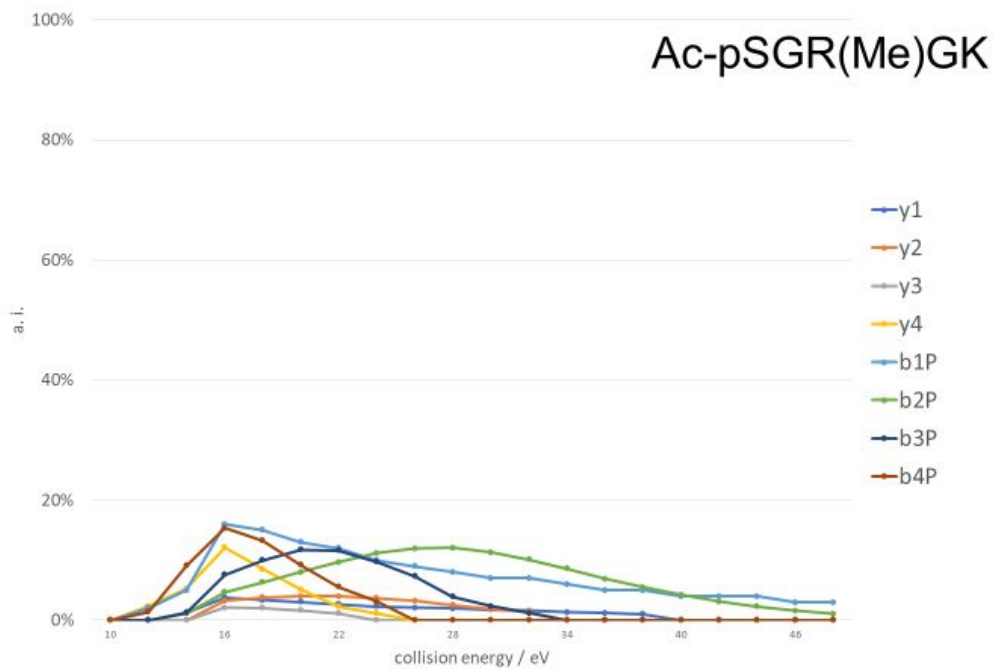

**Figure S1k** Fragment distribution of the peptide Ac-pSGR(Me)GK upon higher-energy collision-induced dissociation (HCD) as a function of collision energy

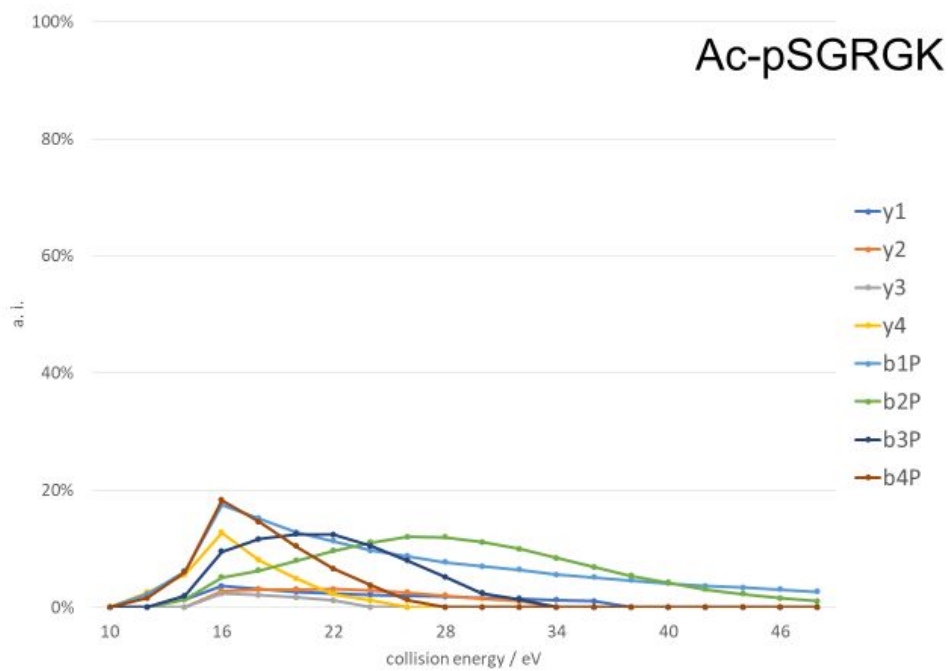

**Figure S1l** Fragment distribution of the peptide Ac-pSGRGK upon higher-energy collision-induced dissociation (HCD) as a function of collision energy

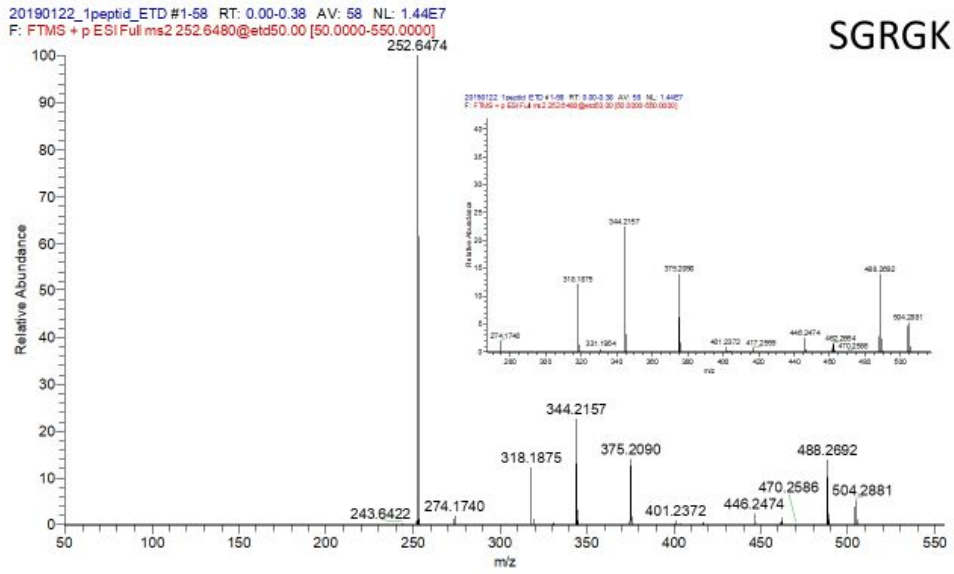

**Figure S2a** ETD tandem mass spectrum of the peptide SGRGK

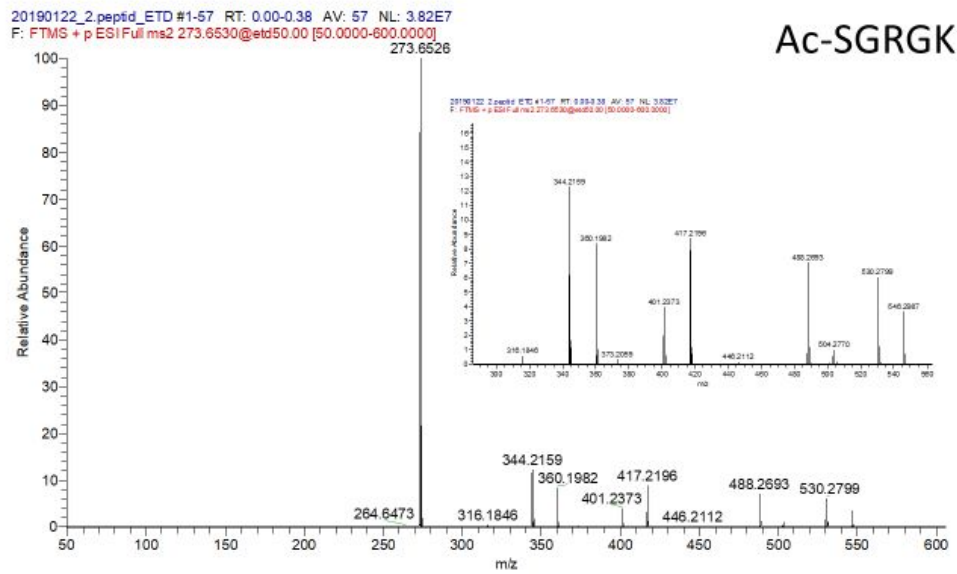

**Figure S2b** ETD tandem mass spectrum of the peptide Ac-SGRGK



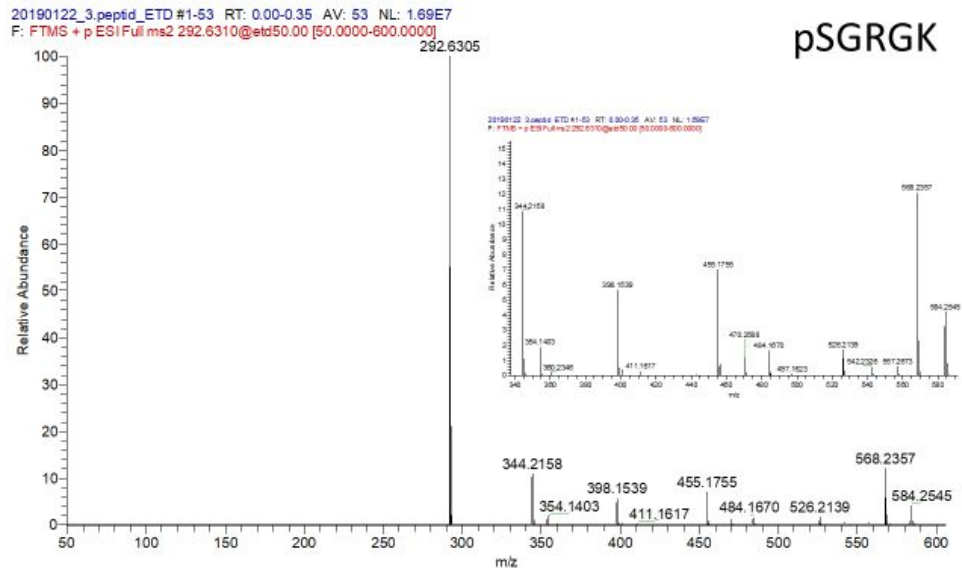

**Figure S2c** ETD tandem mass spectrum of the peptide pSGRGK

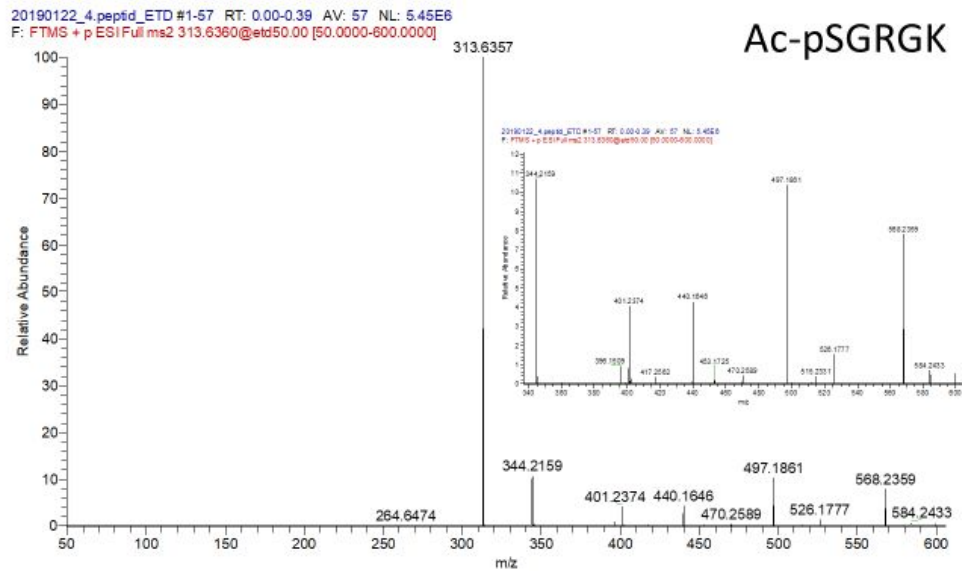

**Figure S2d** ETD tandem mass spectrum of the peptide Ac-pSGRGK

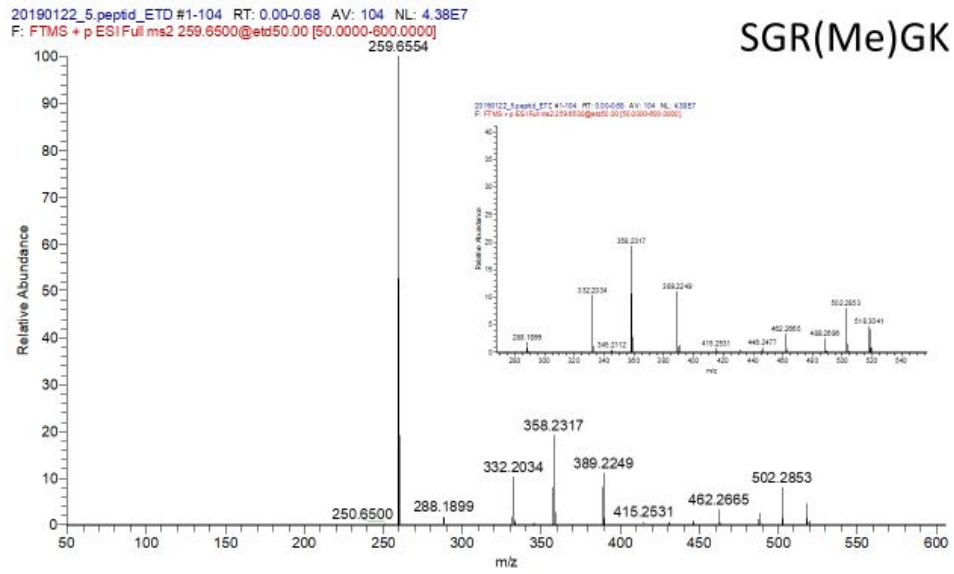

**Figure S2e** ETD tandem mass spectrum of the peptide SGR(Me)GK

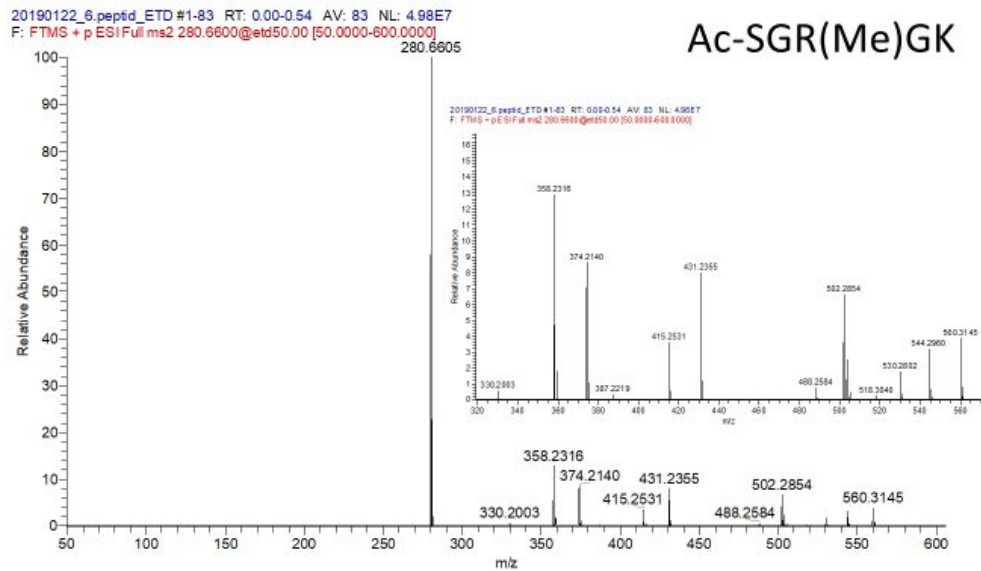

**Figure S2f** ETD tandem mass spectrum of the peptide Ac-SGR(Me)GK

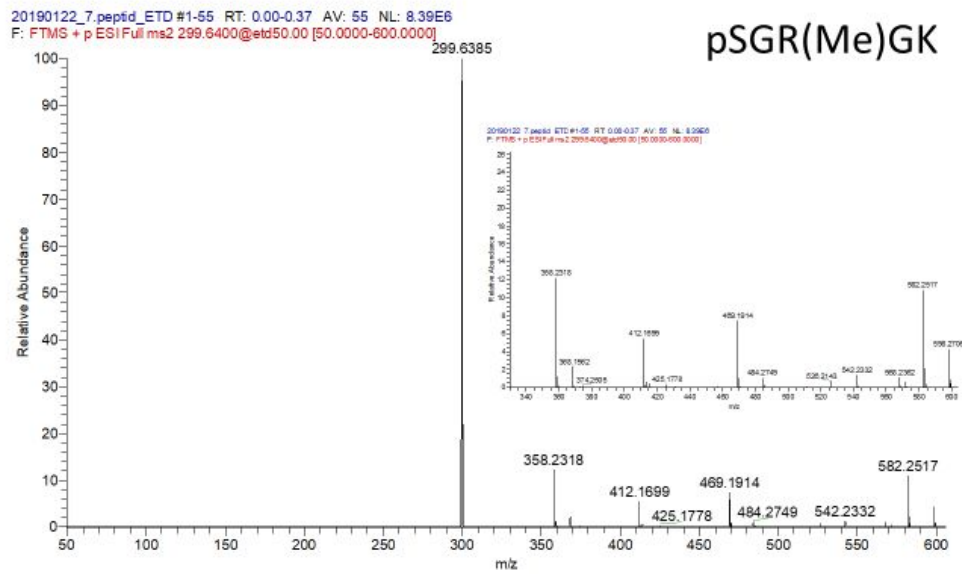

**Figure S2g** ETD tandem mass spectrum of the peptide pSGR(Me)GK

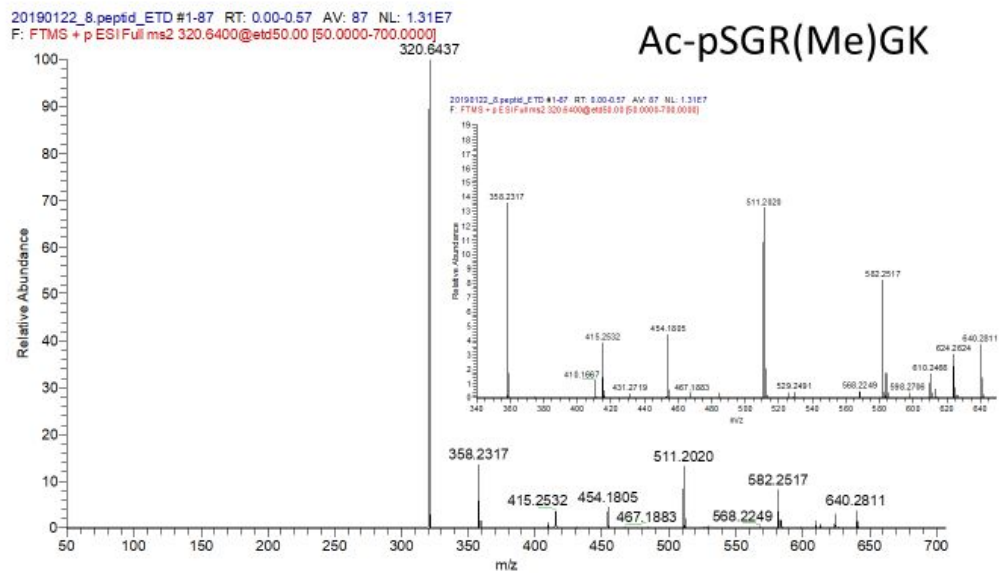

**Figure S2h** ETD tandem mass spectrum of the peptide Ac-pSGR(Me)GK

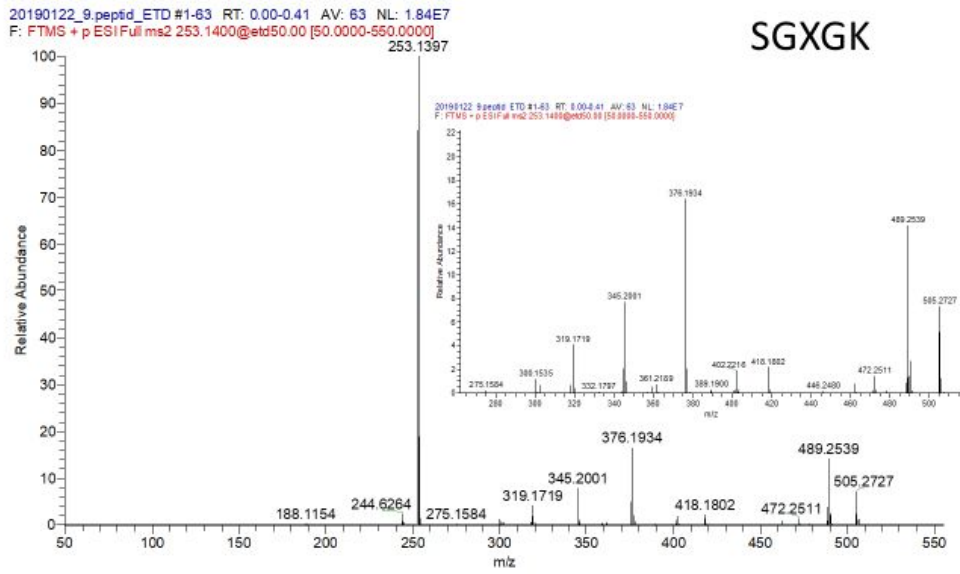

Figure S2i ETD tandem mass spectrum of the peptide SGXGK

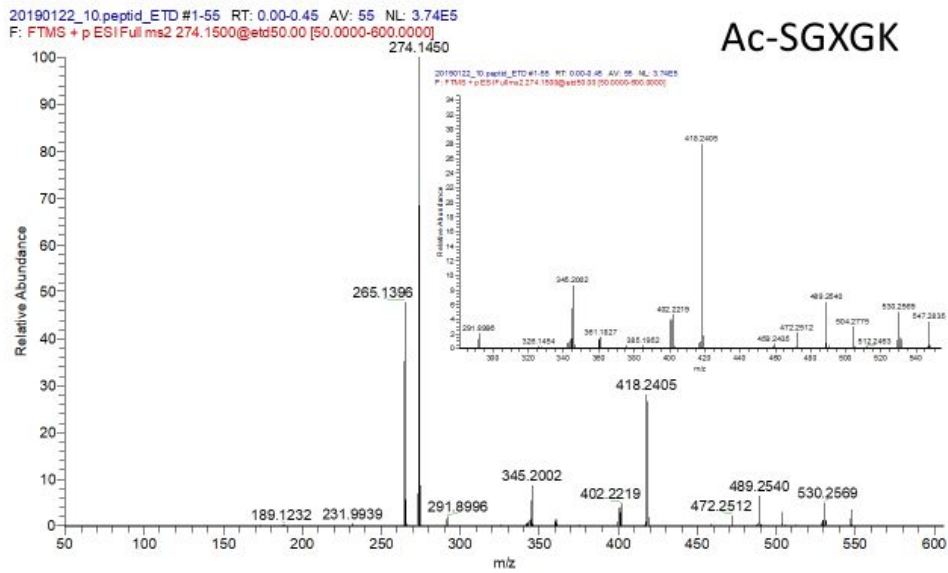

Figure S2j ETD tandem mass spectrum of the peptide Ac-SGXGK

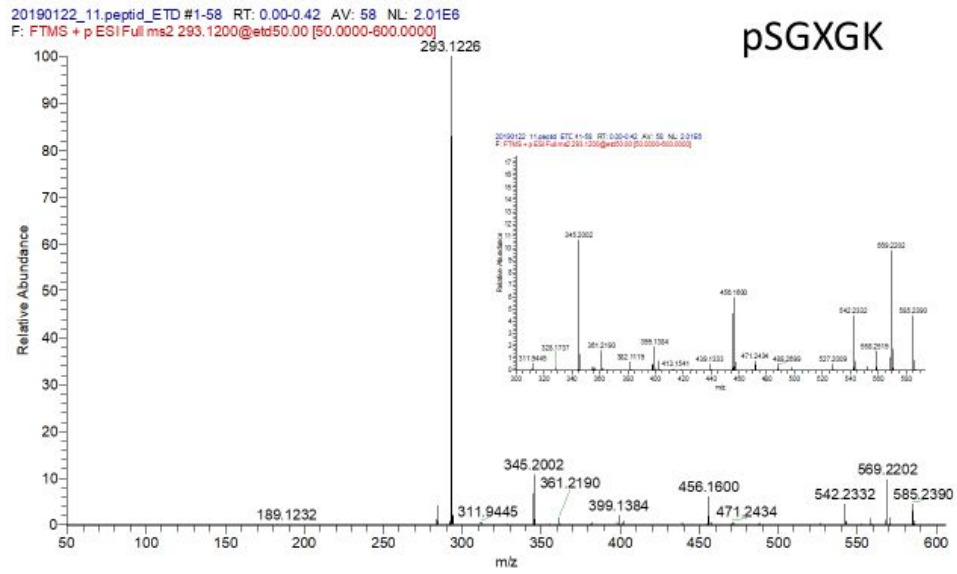

**Figure S2k** ETD tandem mass spectrum of the peptide pSGXGK

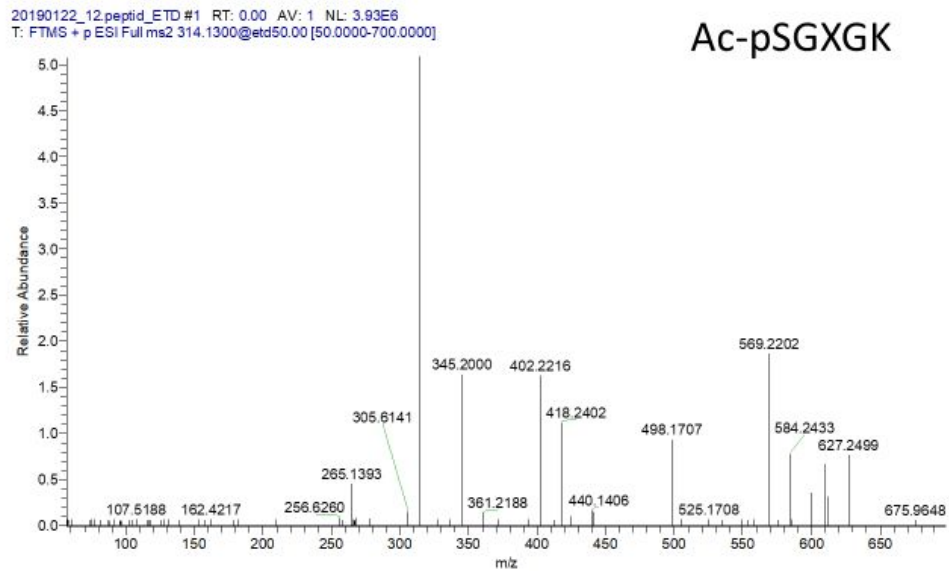

**Figure S2l** ETD tandem mass spectrum of the peptide Ac-pSGXGK

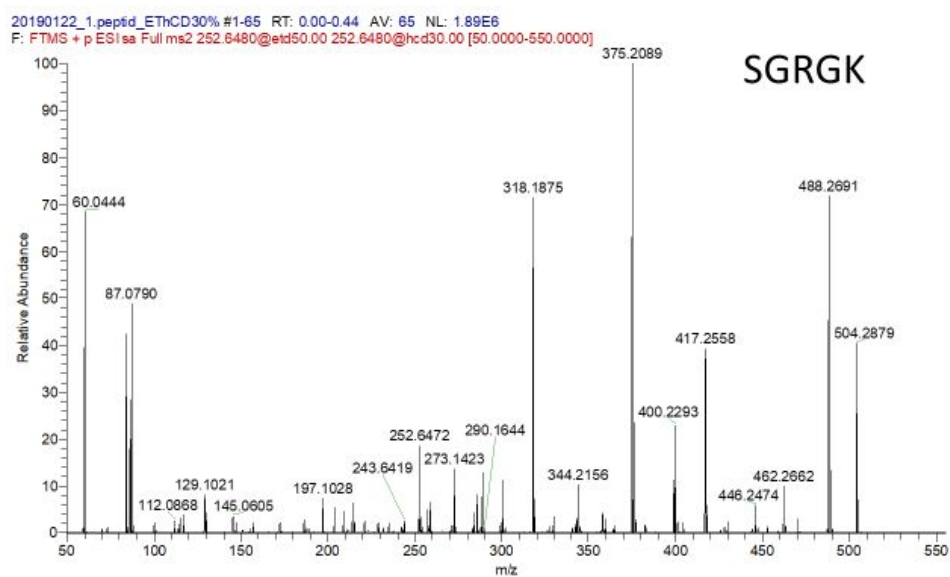

**Figure S3a** EThcD tandem mass spectrum of the peptide SGRGK

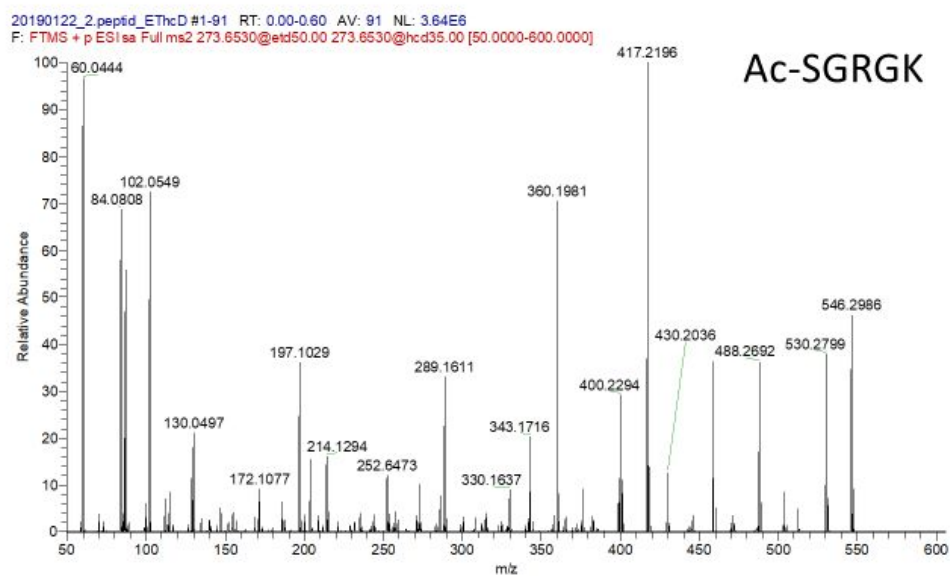

**Figure S3b** EThcD tandem mass spectrum of the peptide Ac-SGRGK

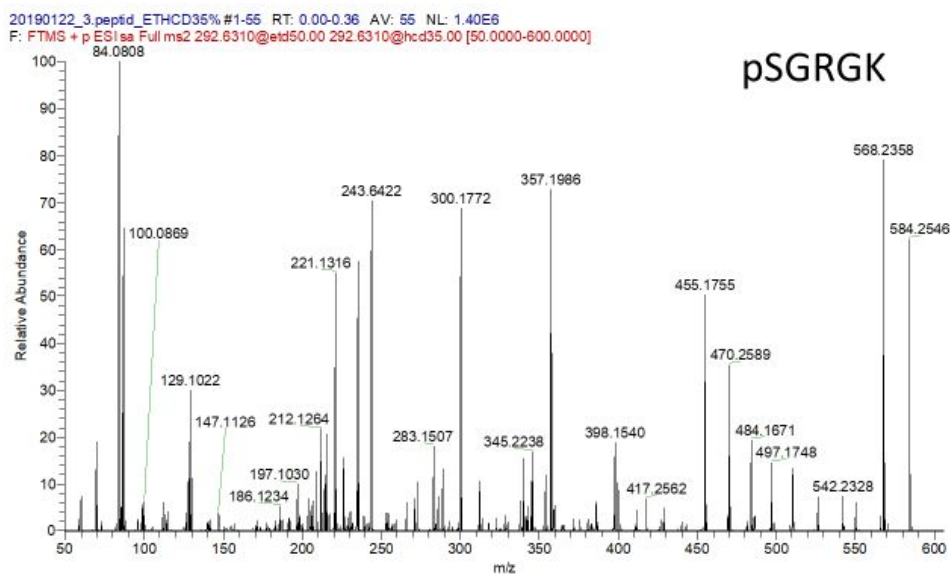

**Figure S3c** ETHcD tandem mass spectrum of the peptide pSGRGK

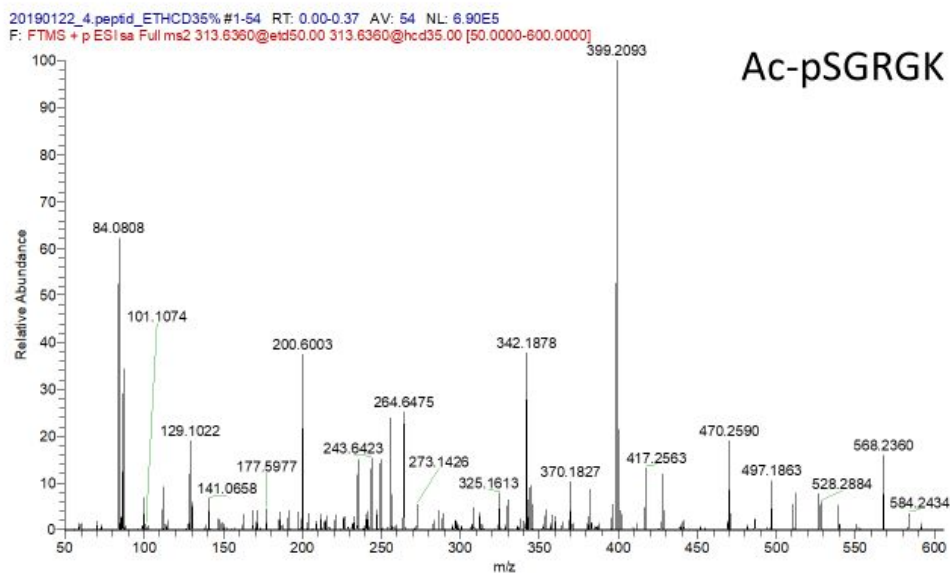

**Figure S3d** ETHcD tandem mass spectrum of the peptide Ac-pSGRGK

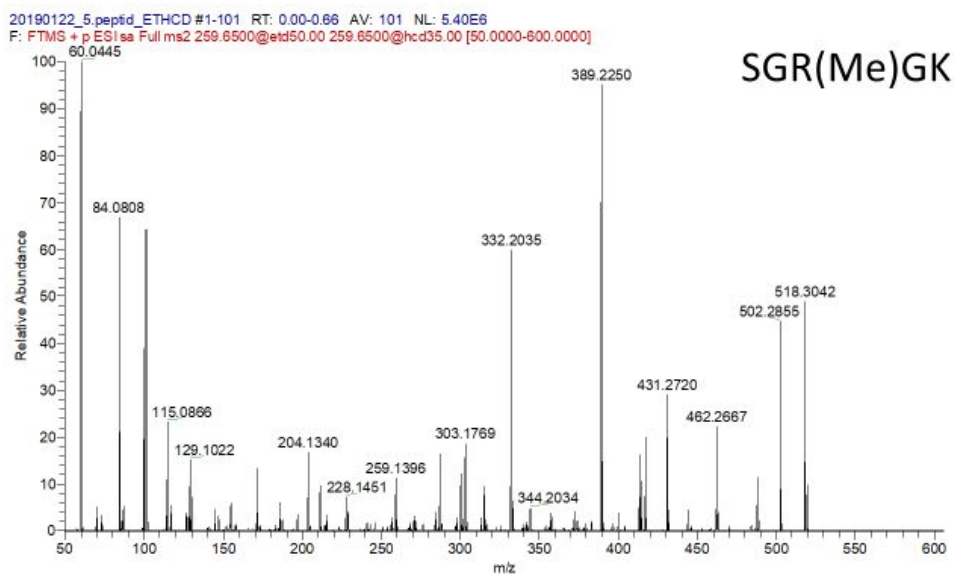

**Figure S3e** ETHcD tandem mass spectrum of the peptide SGR(Me)GK

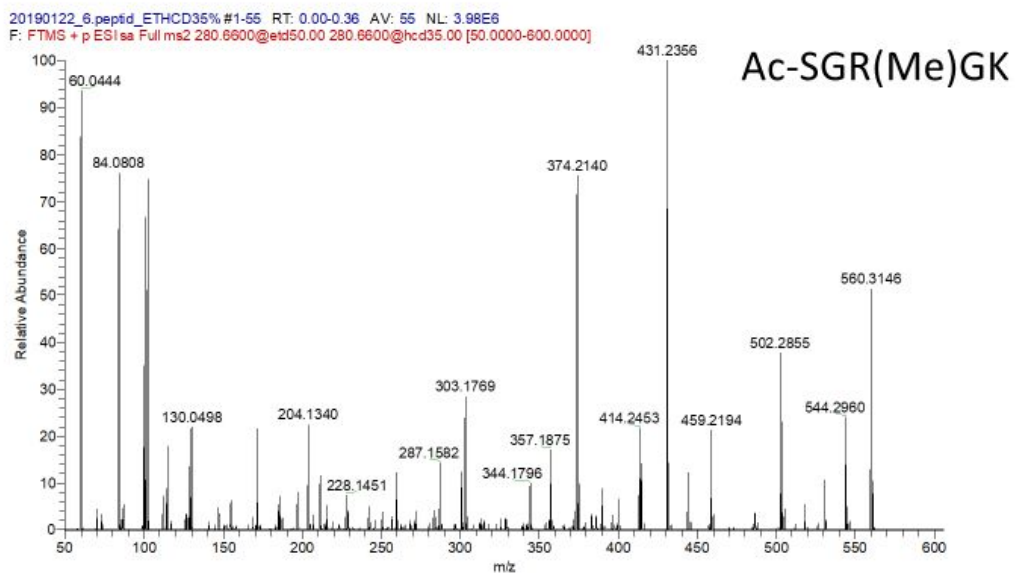

**Figure S3f** ETHcD tandem mass spectrum of the peptide Ac-SGR(Me)GK



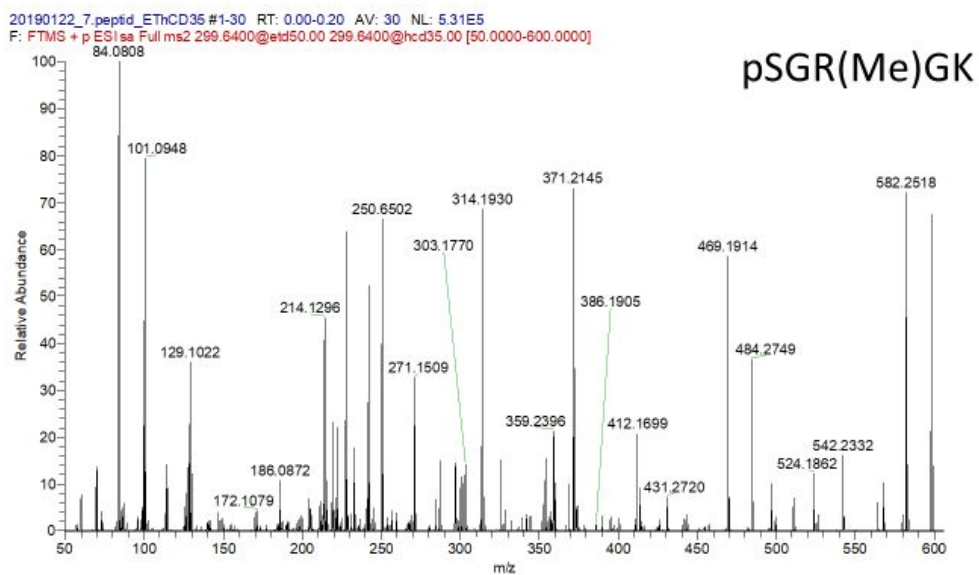

**Figure S3g** ETHcD tandem mass spectrum of the peptide pSGR(Me)GK

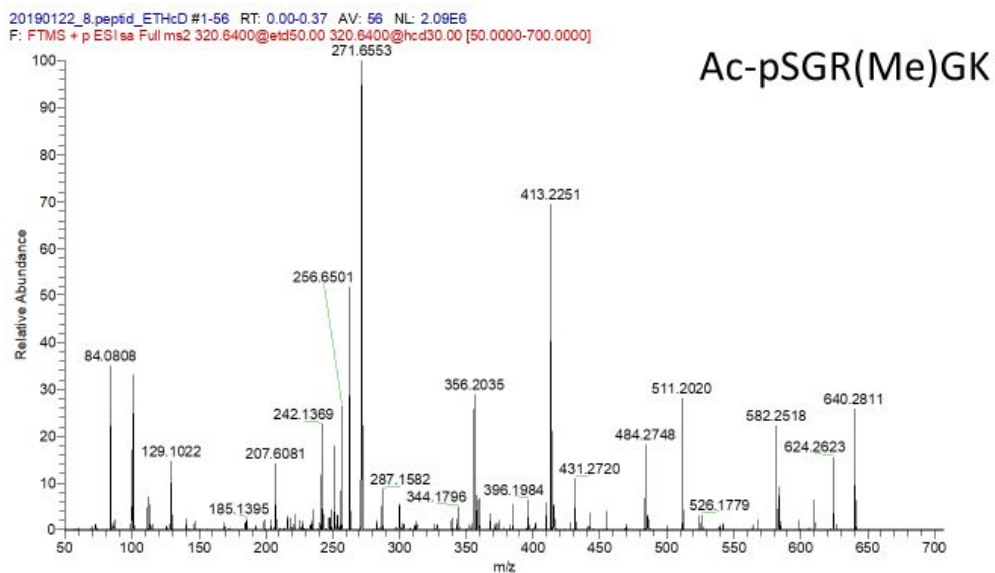

**Figure S3h** ETHcD tandem mass spectrum of the peptide Ac-pSGR(Me)GK

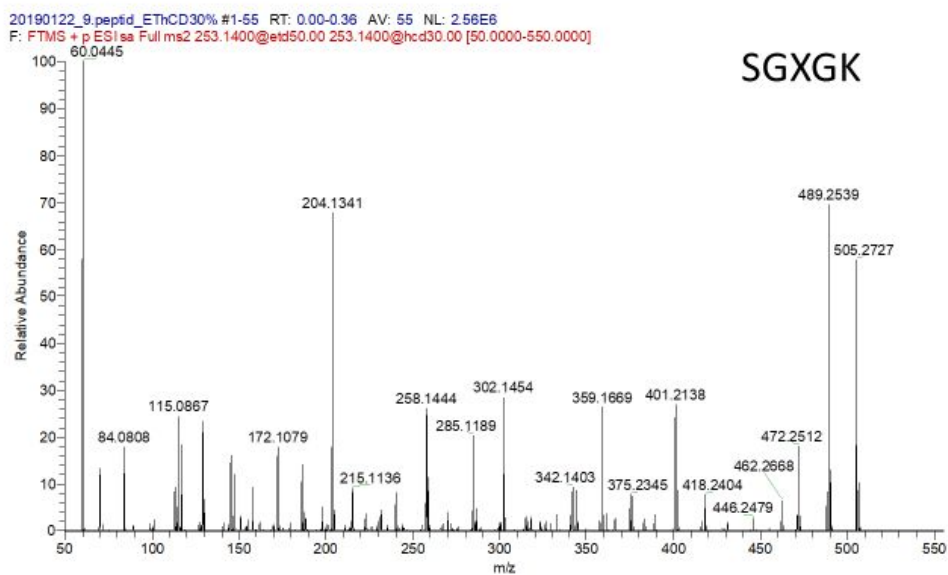

**Figure S3i** ETHcd tandem mass spectrum of the peptide SGXGK

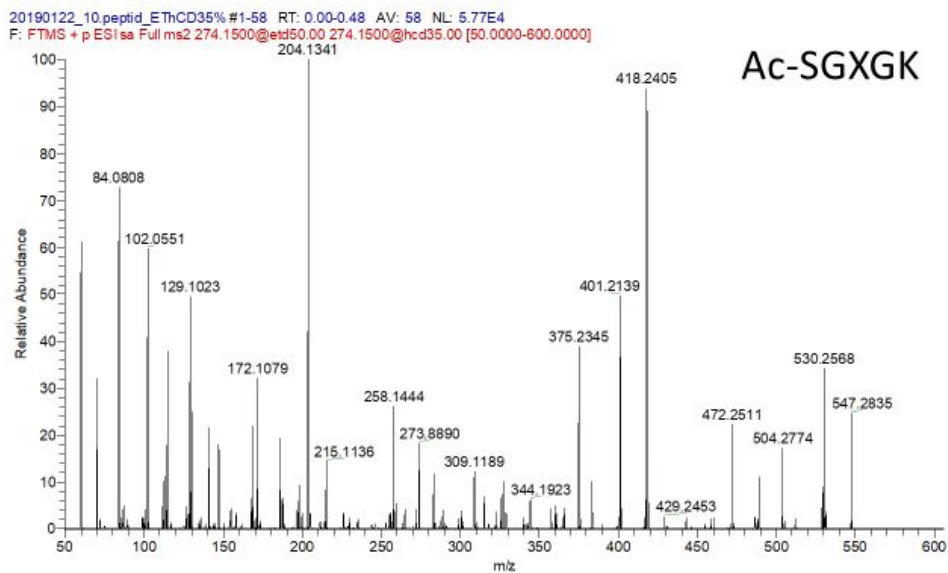

**Figure S3j** ETHcd tandem mass spectrum of the peptide Ac-SGXGK

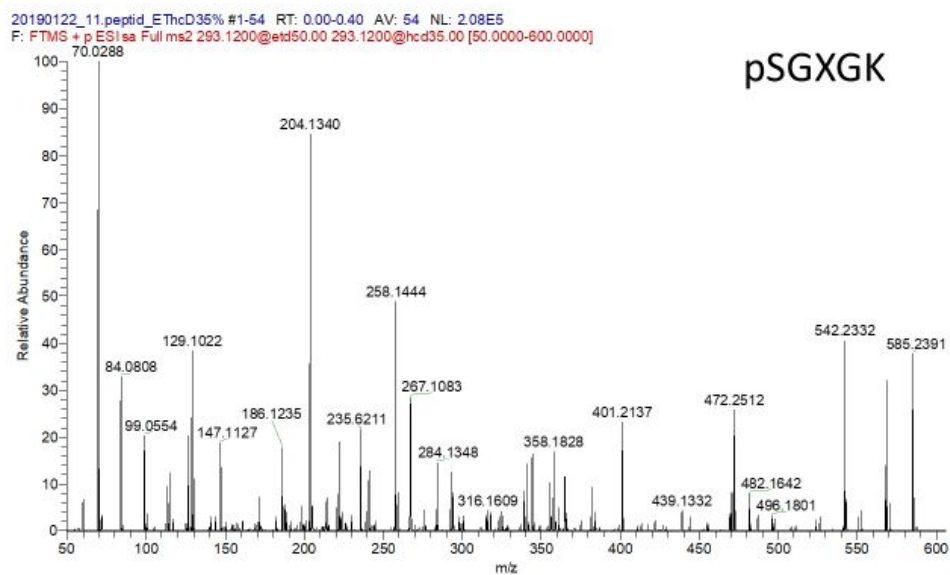

**Figure S3k** ETHcD tandem mass spectrum of the peptide pSGXGK

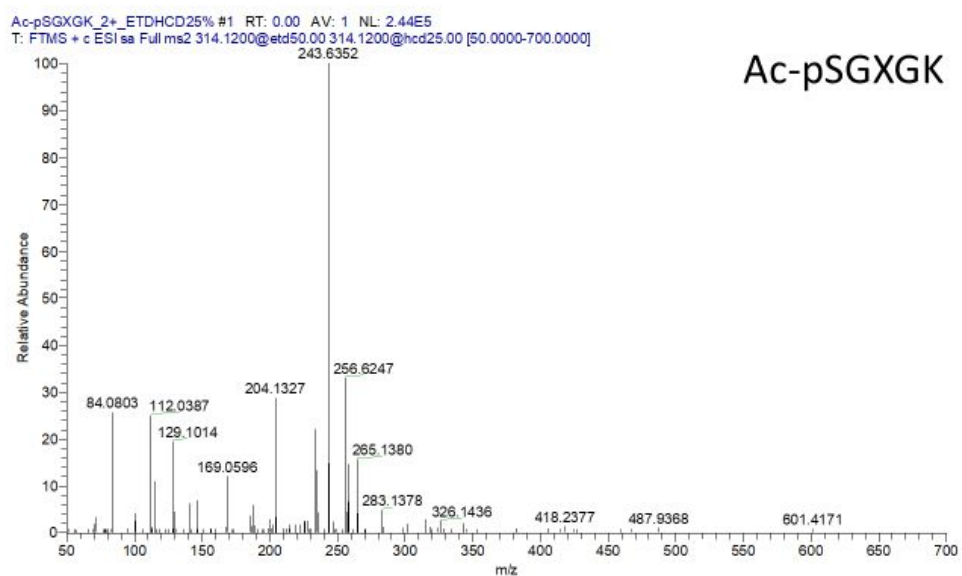

**Figure S3l** ETHcD tandem mass spectrum of the peptide Ac-pSGXGK

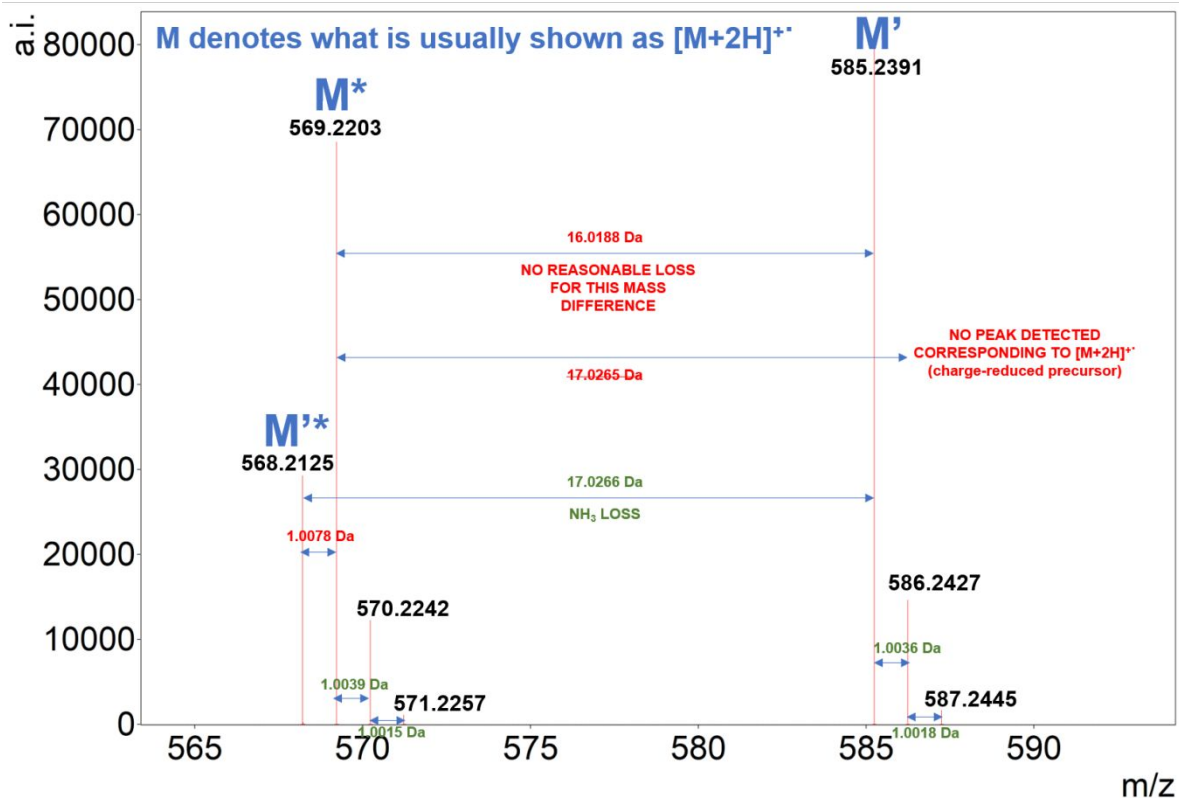

**Figure S4** Representation of 'unusual isotope distributions' in the ETHcD spectrum of the peptide pSGXGK

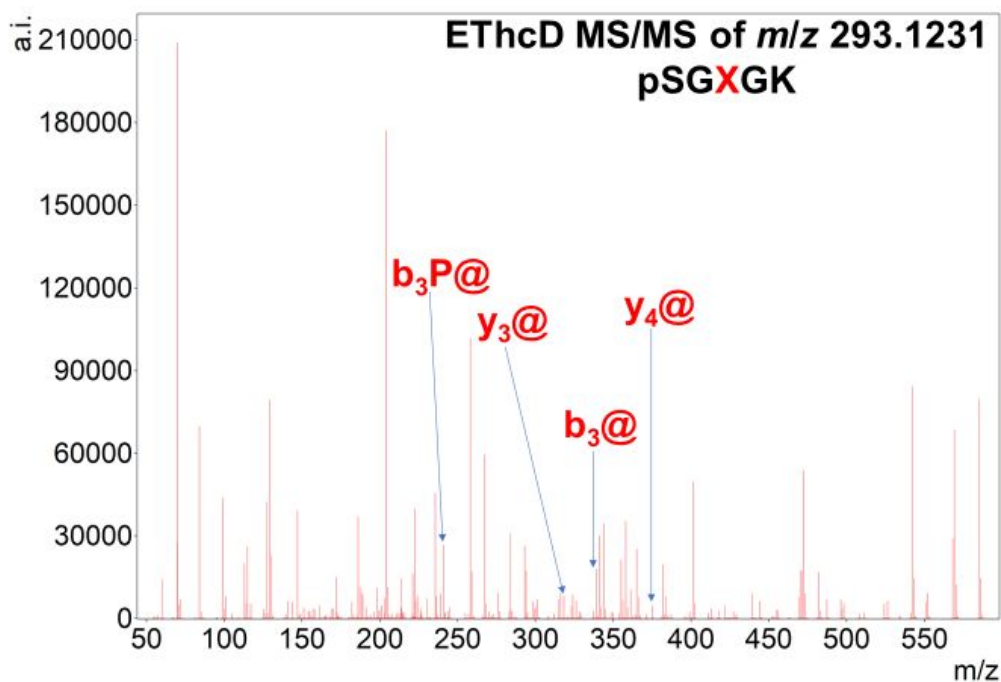

**Figure S5** Representation of isocyanic acid loss (@) from all fragments that contain the citrulline residue in an ETHcD tandem mass spectrum

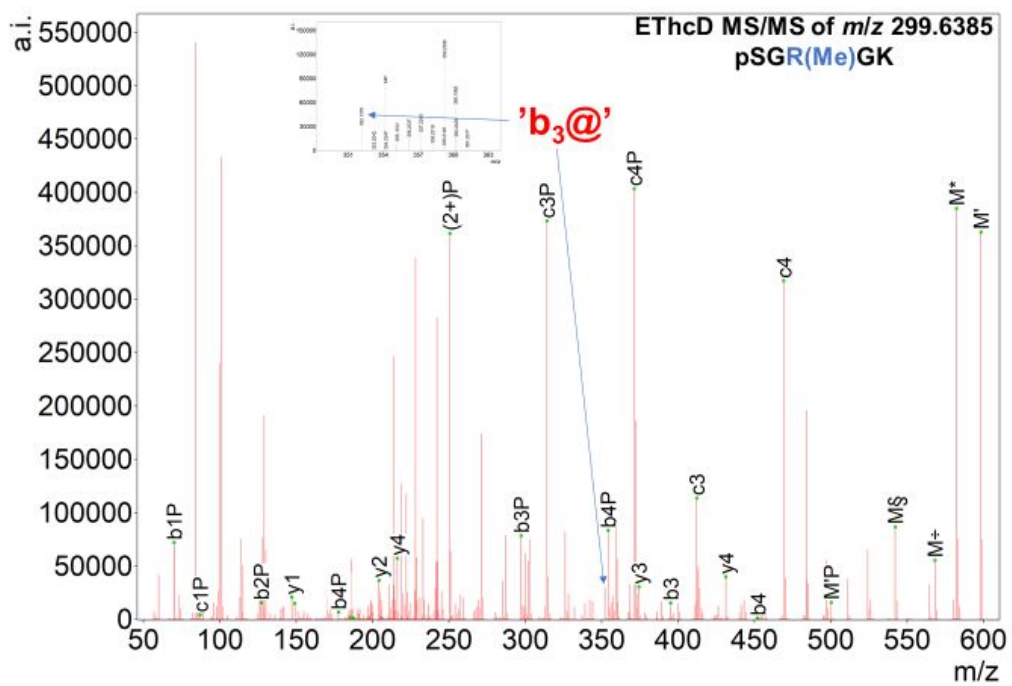

**Figure S6** Representation of a false neutral loss of isocyanic acid (@) for the peptide pSGR(Me)GK which lacks a citrulline residue
